# Supplementary material for: Human germ cell formation in xenotransplants of induced pluripotent stem cells carrying X chromosome aneuploidies
Source: PubMed Central journal article supplement — Sci Rep. 2014 Sep 22;4:6432. doi: 10.1038/srep06432 (PMC4170197; doi:10.1038/srep06432), 2014-09-22
Supplement: srep06432-s1.pdf [file srep06432-s1.pdf]

# **Human germ cell formation in xenotransplants of induced pluripotent stem cells carrying X chromosome aneuploidies**

Antonia A. Dominguez<sup>1</sup>, H. Rosaria Chiang<sup>1</sup>, Meena Sukhwani<sup>2</sup>, Kyle E. Orwig<sup>2</sup> & Renee A. Reijo Pera<sup>1,\*,\*\*</sup>

<sup>1</sup> Department of Genetics; Department of Obstetrics and Gynecology; Institute for Stem Cell Biology and Regenerative Medicine, Stanford University, CA, USA

<sup>2</sup> Department of Obstetrics, Gynecology and Reproductive Sciences, Magee-Womens Research Institute, University of Pittsburgh School of Medicine, Pittsburgh, PA, USA

\*\* Current Address: Department of Cell Biology and Neurosciences, Montana State University, 207 Montana Hall, Bozeman, MT 59711-2460

\* Correspondence: Renee A. Reijo Pera ([renee.rejopera@montana.edu](mailto:renee.rejopera@montana.edu))

**Supplementary Table S1: Fibroblast and iPSC line information**

| <b>Fibroblast Line</b>                  | <b>iPSC Line</b> | <b>Source</b> | <b>Age</b>     | <b>Karyotype</b>        | <b>Reprogramming Method</b> | <b>Subclone</b> |
|-----------------------------------------|------------------|---------------|----------------|-------------------------|-----------------------------|-----------------|
| <b>Turner Syndrome Child 1</b>          | TSC1             | ATCC          | 3.5 years      | 45,X + centric fragment | Retroviral                  | 2               |
| <b>Turner Syndrome Child 2</b>          | TSC2             | Coriell       | 8 years        | 45,X                    | Lentiviral                  | 2               |
| <b>Turner Syndrome Fetal</b>            | TSF              | Coriell       | 18 fetal weeks | 45,X                    | Lentiviral                  | 2               |
| <b>Turner Syndrome Neonate</b>          | TSN              | Coriell       | 1 day          | 45,X                    | Lentiviral                  | 2               |
| <b>Control Female</b>                   | Control          | Skin Biopsy   | 30 years       | 46,XX                   | Retroviral & Lentiviral     | 3               |
| <b>Premature Ovarian Failure Female</b> | POF              | Skin Biopsy   | 32 years       | 46,X                    | Retroviral & Lentiviral     | 3               |

**Supplementary Table 2: Primer sets used for single cell qRT-PCR**

|                               | Forward Primer Sequence    | Reverse Primer Sequence |
|-------------------------------|----------------------------|-------------------------|
| <b>Pluripotency</b>           |                            |                         |
| DNMT3B                        | AGGGACATCTCACGGTTCC        | CCCTGTGAGCAGCAGAAAC     |
| LIN28A                        | CATGCAGAAGCGCAGATCAA       | GGTGGCAGCTTGCATTCC      |
| SALL4                         | CACTGGAGAGAAGCCTTTTGTG     | CCCCGTGTGTCATGTAGTGA    |
| NANOG                         | TGCAGAGAAGAGTGTGCGAAA      | GCTGGGTGGAAGAGAACACA    |
| ALPL                          | GTTGACACCTGGAAGAGCTTCA     | GAGTTCCGTGCGGTTCCA      |
| <b>Pseudoautosomal</b>        |                            |                         |
| PLCXD1                        | GTGCTGAAATGGTCCGTCAC       | TCCAGCATGTGGGCTATCC     |
| GTPBP6                        | TGGACAGGCTTCGCAAGAA        | TACCCACCACGGAGATCA      |
| PPP2R3B                       | CCAAGATGATAGACAGGATCTTCTCA | TCGGCATAGCTGATCTTCCC    |
| CSF2RA                        | AGGAGTCACATTTGAGGTTCA      | GAAATTCTGAGCAGCGGTAC    |
| SLC25A6                       | CCGATCGAGCGGGTCAA          | GATGCGGACAATGCAGTCC     |
| AKAP17A                       | TCATGTACAAGGGCGAGGAC       | TCACTCAGGTGTTTGGTCCGAA  |
| DHRX                          | CACCCGTCTGGCGAAGAA         | TGCTGCGTAGATGGAAGTCC    |
| ZBED1                         | TGCATCCTGCAGTGAAGAA        | GTTGGAGGTGTTTCCGGAGTA   |
| CD99                          | CACCGAACCCACCCAAAC         | CGCAAGGTCAGCATCTGAAA    |
| VAMP7                         | GCTCGAGCCATGTGTATGAA       | CACCACAGAGAGGTGAAACA    |
| <b>X-linked</b>               |                            |                         |
| PRKX                          | ACTGCTCGTGGTTGACAGAA       | GAACCACCGATGATGCTTCC    |
| NLGN4X                        | CCGGTCTGCGTCATGTTAAA       | TGGCTGTCAATGAGGGTGAA    |
| TBL1X                         | TCAAATGGGATCCGTCTGGAA      | ACCTCCTGTTTCATGCTCCA    |
| TMSB4X                        | AGACCAGACTTCGCTCGTA        | CAGCCATATCGGGTTTGTCA    |
| ZFX                           | ACTTGCCCTGAGGTCATCAA       | CTCTCCACAATGTCTACAGTTC  |
| USP9X                         | AAGCAGTGAGTGGCTGGAA        | TTGGCCACACATAGCTCCA     |
| DDX3X                         | AGTTTCTCAGTGATCGTGGAA      | TGCCAATGCCATCGTAATCAC   |
| KDM6A                         | ACCAATTCCCGCAGAGCTTA       | TGTCCACCCTCCAATTGTCA    |
| TSPLYL2                       | AGAAAGGGGCTCCAGGATAAA      | TCCATGATCACCACCTCACA    |
| KDM5C                         | GTGCAGCCTTCCAAGTTCAA       | ATGTCTTCTCTGTGGGTTCC    |
| RPS4X                         | GTGCCTTTGCTGTACATCGTA      | GCGGGCATCATGAGTCAC      |
| RBMX                          | TGGAGCTTGAACCCATTGTCA      | CCTGGGCGATCTGCTTCA      |
| <b>XCI Associated</b>         |                            |                         |
| XIST                          | AGCTCCTCGGACAGCTGTAA       | GGACACATGCAGCGTGGTA     |
| <b>Germ Layer</b>             |                            |                         |
| KDR                           | AGTGGGCTGATGACCAAGAA       | CCATGCCACTTCCAAAAGCA    |
| KRT7                          | CCAAGGTGGATGCCCTGAA        | GGGACTGCAGCTCTGTCAA     |
| NES                           | GCTGCGGGCTACTGAAAA         | CTGAGCGATCTGGCTCTGTA    |
| NCAM                          | CTCCCAGTCCATGTACCTTGAA     | GGTCCCCTCCCAAGTGTAC     |
| ACTC1                         | GGCTCTGGGCTGGTCAA          | AGGAGTCCTTCTGACCCATAC   |
| AFP                           | GCGGCCTCTTCCAGAACTA        | GGGGCTTTCTTTGTGTAAGCAA  |
| EOMES                         | CTGTGGCAAAGCCGACAATA       | CTCATCCAGTGGGAACCAGTA   |
| FOXA2                         | ACTGGAGCAGCTACTATGCA       | TGTTTATGCCGTTTATCCC     |
| <b>Germ Cell</b>              |                            |                         |
| BOULE                         | AATCGCATCTTTGTAGGAGGAA     | TCACAGACCCATACTGGGAA    |
| STELLA                        | CATGTTACTCGGCGGAGTTC       | ACTCCCTTAGGCTCCTTGTTT   |
| PRDM1A                        | CCTGGTACACACGGGAGAAAA      | TTGAGATTGCTGGTGTGCTA    |
| GFR1A1                        | TTCTGGCGACCCTGTAC          | ACTGGCTTTCACGCAATCC     |
| CKIT                          | GGATTCCCAGAGCCACAA         | ACATCCACTGGCAGTACAGAA   |
| NANOS3                        | CCTGACAAGGCGAAGACACA       | ACTTCCCGGCACCTCTGAA     |
| DAZL                          | CCACAACCACGATGAATCCTA      | GTGATGACCTGAACTGGTGAA   |
| DDX4 (VASA)                   | CGTGTGTCATCAGTTGATACC      | CTGGATTGGGAGCTTGTGAA    |
| IFITM3                        | AAGGGAGGGCTCACTGAGAA       | TTCATGGTGTCCAGCGAAGAC   |
| GDF3                          | CGTCCGCGGGAATGTA           | CTTCTGCAGGCAGGAGGAA     |
| PELOTA                        | AACAAACTGCTCCTGGAAAACC     | AGGGCCTTTTTCAGGGAGTA    |
| PUM1                          | CTCCTGCCCCAGTCATCATTA      | CAGCTGCTCCATTTGCTGAA    |
| <b>Pluripotency/Germ Cell</b> |                            |                         |
| PRDM14                        | CACTCTGGAGACAGACCATACC     | GAGTATGCTGGAGGCTGTGAA   |
| SALL4                         | CACTGGAGAGAAGCCTTTTGTG     | CCCCGTGTGTCATGTAGTGA    |
| OCT4                          | GGGGACCAGTGTCCTTTCC        | GGGAAAGGGACCGAGGAGTA    |

**Supplementary Table 3: RNAseq Reads**

|                        | <b># of Reads</b> | <b># of Reads Mapped</b> | <b>% mapped</b> |
|------------------------|-------------------|--------------------------|-----------------|
| <b>Control c7 iPSC</b> | 23330829          | 21139610                 | 90.6080534      |
| <b>Control c8 iPSC</b> | 32357096          | 29304332                 | 90.56539561     |
| <b>Control GFP-</b>    | 26049335          | 23979380                 | 92.0537127      |
| <b>Control GFP+</b>    | 18963035          | 17287623                 | 91.16485309     |
| <b>H9 hESC</b>         | 27467071          | 25046225                 | 91.18637004     |
| <b>H9 GFP-</b>         | 22299891          | 20344285                 | 91.2304235      |
| <b>H9 GFP+</b>         | 20454034          | 18607504                 | 90.97229427     |
| <b>TSC1 c1 iPSC</b>    | 31547635          | 28404049                 | 90.03543055     |
| <b>TSC1 c2 iPSC</b>    | 39110831          | 35149362                 | 89.87117149     |
| <b>TSC1 GFP-</b>       | 29312969          | 26886076                 | 91.72075336     |
| <b>TSC1 GFP+</b>       | 33955023          | 30664415                 | 90.3089213      |
| <b>Triple X iPSC</b>   | 42850128          | 39294051                 | 91.70112864     |
| <b>Triple X GFP+</b>   | 32586396          | 29371187                 | 90.13327832     |

**Supplementary Table 4: Log sheet and counts for xenotransplantation of pluripotent stem cells**

L = Left testis, R = Right testis

| Cells                           | Mouse ID | Testis Site | Injected Cell # | Weight of testis | # Tubules /section | NUMA+ Cells /tubule | % NUMA/VASA + tubules | Total NUMA/VASA + Cells | NUMA/VASA + cells /tubule |
|---------------------------------|----------|-------------|-----------------|------------------|--------------------|---------------------|-----------------------|-------------------------|---------------------------|
| Triple X iPSC Passage 28        | 3956     | R           | 792411          | 31.56            | -                  | -                   | -                     | -                       | -                         |
|                                 |          | L           | 1109376         | 54.52            | -                  | -                   | -                     | -                       | -                         |
|                                 | 3957     | R           | 1088832         | 29.20            | -                  | -                   | -                     | -                       | -                         |
|                                 |          | L           | 933284          | 28.42            | -                  | -                   | -                     | -                       | -                         |
|                                 | 3858     | R           | 1088832         | 25.21            | -                  | -                   | -                     | -                       | -                         |
|                                 |          | L           | 1088832         | 27.89            | -                  | -                   | -                     | -                       | -                         |
|                                 | 4228     | R           | 1324240         | 33.12            | 138.5              | 4.5                 | 3.25                  | 85.17                   | 16.61                     |
|                                 |          | L           | 1324240         | 31.43            | 173.5              | 4.5                 | 2.59                  | 113.17                  | 22.38                     |
|                                 | 4229     | R           | 1135063         | 41.99            | 237.33             | 25.66               | 10.81                 | 272.33                  | 10.59                     |
| L                               |          | 945886      | 44.02           | 196              | 18.5               | 9.44                | 264.5                 | 14.2                    |                           |
| 4230                            | R        | 1324240     | 48.55           | 258              | 58.33              | 22.61               | 736.83                | 12.58                   |                           |
|                                 | L        | 1135063     | 45.35           | 264.67           | 88.67              | 33.50               | 1152.33               | 14.45                   |                           |
| Control iPSC Clone 8 Passage 32 | 3959     | R           | 1388289         | 60.64            | -                  | -                   | -                     | -                       | -                         |
|                                 |          | L           | 1189962         | 120.22           | -                  | -                   | -                     | -                       | -                         |
|                                 | 3960     | R           | 1388289         | 52.13            | -                  | -                   | -                     | -                       | -                         |
|                                 |          | L           | 1388289         | 44.92            | -                  | -                   | -                     | -                       | -                         |
|                                 | 3961     | R           | 1388289         | 44.22            | -                  | -                   | -                     | -                       | -                         |
|                                 |          | L           | 1388289         | 144.30           | -                  | -                   | -                     | -                       | -                         |
|                                 | 4224     | R           | 1430416         | 35.40            | 153.83             | 54.83               | 35.64                 | 1134.33                 | 22.03                     |
|                                 |          | L           | 1430416         | 27.49            | 208.75             | 42.75               | 20.48                 | 759.5                   | 17.73                     |
| 4225                            | R        | 1430416     | 95.17           | 150.33           | 20.33              | 13.53               | 440                   | 21.58                   |                           |
|                                 | L        | 1430416     | 62.35           | 116              | 15                 | 12.93               | 235                   | 15.63                   |                           |
| Control iPSC Clone 7 Passage 22 | 3962     | R           | 1674836         | 28.79            | -                  | -                   | -                     | -                       | -                         |
|                                 |          | L           | 1674836         | 33.43            | -                  | -                   | -                     | -                       | -                         |
|                                 | 3963     | R           | 1674836         | 41.34            | -                  | -                   | -                     | -                       | -                         |
|                                 |          | L           | 717787          | 33.76            | -                  | -                   | -                     | -                       | -                         |
|                                 | 3964     | R           | 1674836         | 44.05            | -                  | -                   | -                     | -                       | -                         |
|                                 |          | L           | 1674836         | 38.00            | -                  | -                   | -                     | -                       | -                         |
| 3965                            | R        | 1674836     | 45.76           | -                | -                  | -                   | -                     | -                       |                           |
| L                               | 1435574  | 40.37       | -               | -                | -                  | -                   | -                     | -                       |                           |
| TSC1 iPSC Clone 1 Passage 26    | 3997     | R           | 803689          | 52.27            | -                  | -                   | -                     | -                       | -                         |
|                                 |          | L           | 688876          | 44.40            | -                  | -                   | -                     | -                       | -                         |
|                                 | 3998     | R           | 1126213         | 30.96            | -                  | -                   | -                     | -                       | -                         |
|                                 |          | L           | 1126213         | 74.91            | -                  | -                   | -                     | -                       | -                         |
|                                 | 3999     | R           | 803689          | 54.16            | -                  | -                   | -                     | -                       | -                         |
| L                               | 803689   | 66.67       | -               | -                | -                  | -                   | -                     | -                       |                           |
| TSC1 iPSC Clone 2 Passage 25    | 4000     | R           | 1126212         | 60.64            | 267.5              | 56.5                | 21.12                 | 772                     | 13.67                     |
|                                 |          | L           | 1126212         | 120.22           | 203.5              | 24.5                | 12.04                 | 458                     | 18.70                     |
|                                 | 4001     | R           | 803689          | 52.13            | 156.5              | 17                  | 10.86                 | 220                     | 12.89                     |
|                                 |          | L           | 803689          | 44.92            | 39                 | 2                   | 5.13                  | 53                      | 26.5                      |
|                                 | 4002     | R           | 1126212         | 44.22            | 149.75             | 63.25               | 42.24                 | 1670                    | 26.17                     |
|                                 |          | L           | 1126212         | 144.30           | 150                | 62.25               | 41.50                 | 1979.75                 | 32.31                     |
|                                 | 4246     | R           | 1467889         | 58.56            | 184.75             | 13.5                | 7.31                  | 217.25                  | 16.13                     |
|                                 |          | L           | 1467889         | 56.18            | 140                | 20                  | 14.29                 | 530.75                  | 27.03                     |
|                                 | 4247     | R           | 1258190         | 34.66            | 138.25             | 38                  | 27.49                 | 538                     | 14.73                     |
|                                 |          | L           | 1467889         | 32.92            | 258.25             | 64.25               | 24.88                 | 927.75                  | 13.88                     |
| 4248                            | R        | 1467889     | 28.78           | 267.5            | 56.5               | 21.12               | 772                   | 13.67                   |                           |
|                                 | L        | 1467889     | 43.1            | 203.5            | 24.5               | 12.04               | 458                   | 18.70                   |                           |
| H9 hESC P58                     | 4023     | R           | 1232470         | 23.48            | 143                | 5                   | 3.50                  | 133.33                  | 26.39                     |
|                                 |          | L           | 1232470         | 22.92            | 120.75             | 8                   | 6.60                  | 188.5                   | 22.93                     |
|                                 | 4024     | R           | 1232470         | 88.83            | 188.67             | 74.33               | 39.58                 | 1446.33                 | 18.61                     |
|                                 |          | L           | 1056403         | 35.84            | 208.33             | 86                  | 41.63                 | 187.33                  | 21.89                     |
| H1                              | 3764     | R           | 2010680         | 1520             | 20                 | 5                   | 25                    | -                       | 22.4                      |
|                                 |          | L           | 2010680         | 336              | 39                 | 2                   | 5.13                  | -                       | 32                        |
|                                 | 3766     | L           | 2010680         | 1350             | 98                 | 8                   | 8.16                  | -                       | 12.25                     |
| Control male iPSC               | 4226     | L           | 941737          | 39.98            | 103                | 13                  | 12.62                 | -                       | 18.53                     |
|                                 |          | R           | 1158108         | 268.39           | 40                 | 2                   | 5                     | -                       | 4                         |
|                                 | 4227     | L           | 941737          | 76.21            | 109                | 49                  | 44.95                 | -                       | 36.22                     |
|                                 |          | R           | 1158108         | 231.33           | 106                | 43                  | 40.57                 | -                       | 43.56                     |

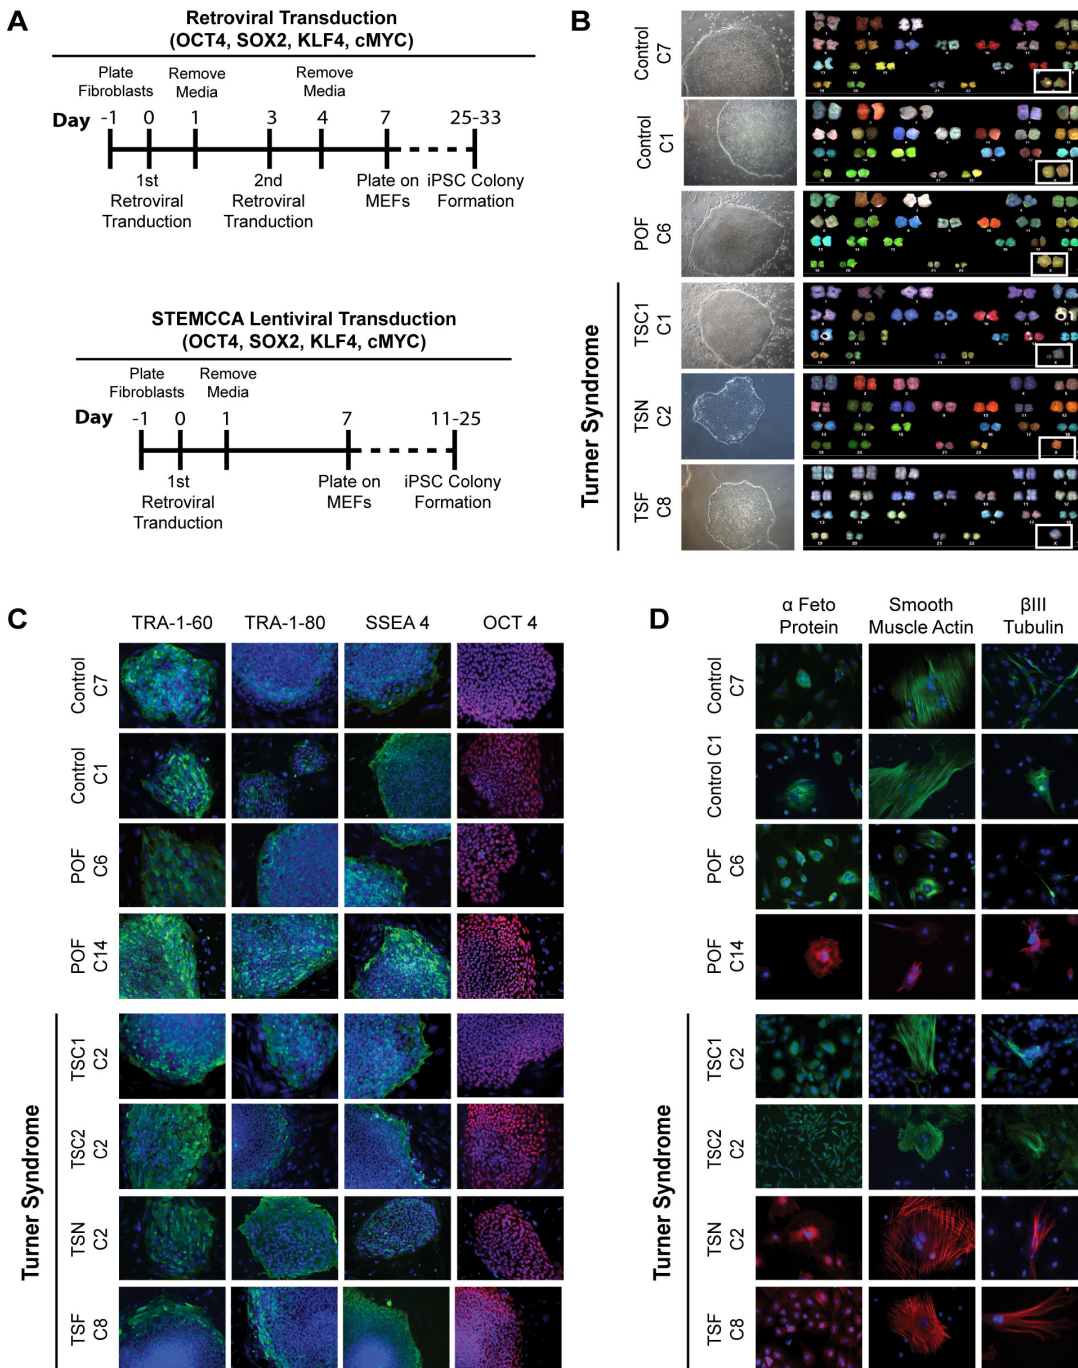

**Supplementary Figure 1: Reprogramming methods and additional iPSC subclone characterization**

(A) Time course of reprogramming for retroviral transduction of OCT4, SOX2, KLF4 and cMYC and lentiviral transduction of the polycistronic STEMCCA vector. (B) Phase contrast image of one iPSC subclone (C = subclone) colony, grown on MEFs or matrigel, derived from Control, POF and Turner syndrome fibroblasts along with their spectral karyotype. White box indicates the X chromosome and demonstrates two X chromosomes in Control and POF iPSC subclones and only one X chromosome in TSC1, TSN and TSF iPSC subclones. (C) Immunofluorescence for cell surface markers TRA-1-60, TRA-1-80 and SSEA4 (green) along with nuclear marker OCT4 (red) marking pluripotent iPSC subclones. Cell nuclei were costained with DAPI (blue). (D) Immunofluorescence for markers of the three germ layers after spontaneous differentiation of iPSC subclones, demonstrating cells expressing  $\alpha$  Feto Protein (endoderm), Smooth Muscle Actin (mesoderm) and  $\beta$ III Tubulin (ectoderm) (green). Cell nuclei were costained with DAPI (blue).

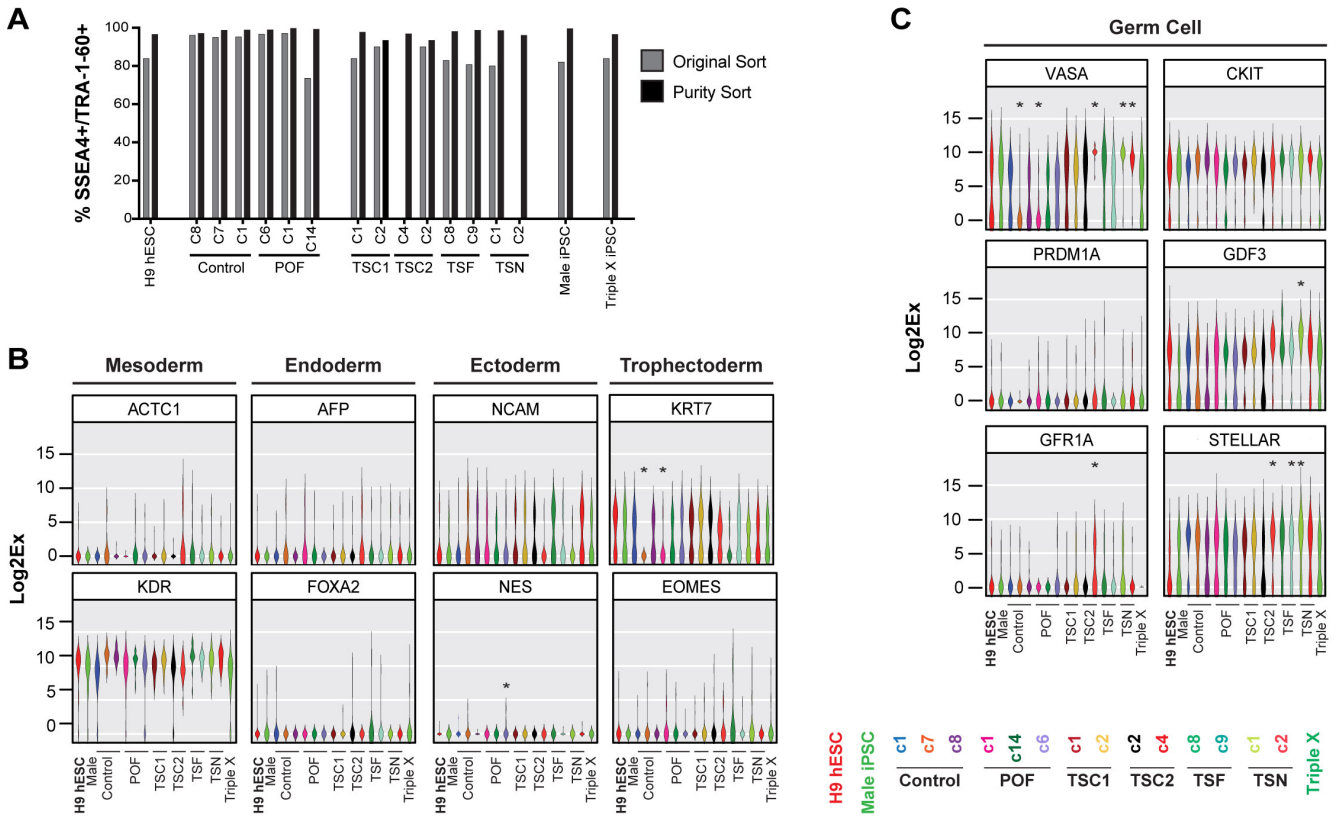

**Supplementary Figure 2: Single cell sorting and analysis of iPSCs for a double positive SSEA4/TRA-60 pluripotent population**

(A) Percentage of SSEA4/TRA-1-60 double positive single cells from original and purity sorts for each subclone of all pluripotent lines and subclones (C = subclone). (B-C) Violin plot representation of Log<sub>2</sub>Ex values (fold change above background) of single cells for (B) mesoderm, endoderm, ectoderm and trophectoderm related genes and (C) germ cell related genes. Asterisk indicates a significant difference in expression (p-value < 0.01) when compared to H9 hESCs. Color-coded subclone information is provided.

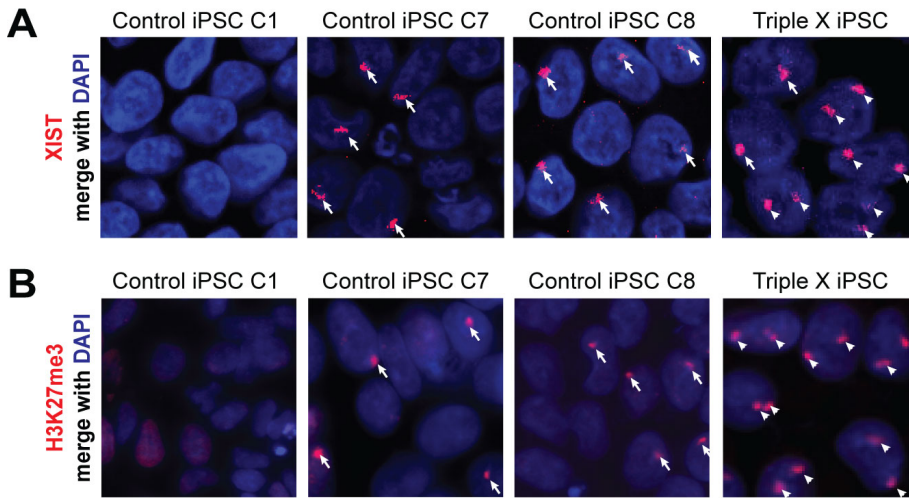

**Supplementary Figure 3: Single cell sorting of iPSCs for a double positive SSEA4/TRA-60 pluripotent population**

(A) *XIST* RNA FISH marking the inactive X chromosome (red punctate dot) in Control iPSC (subclones 1,7 and 8) and Triple X iPSCs. Arrow indicates a cell with a single *XIST* foci and arrowhead indicates a single cell with two *XIST* foci. (B) Immunofluorescence of H3K27me3 marking the inactive X chromosome (red punctate dot) in Control iPSC (subclones 1,7 and 8) and Triple X iPSCs. Arrow indicates a cell with a single H3K27me3 foci and arrowhead indicates a single cell with two H3K27me3 foci.



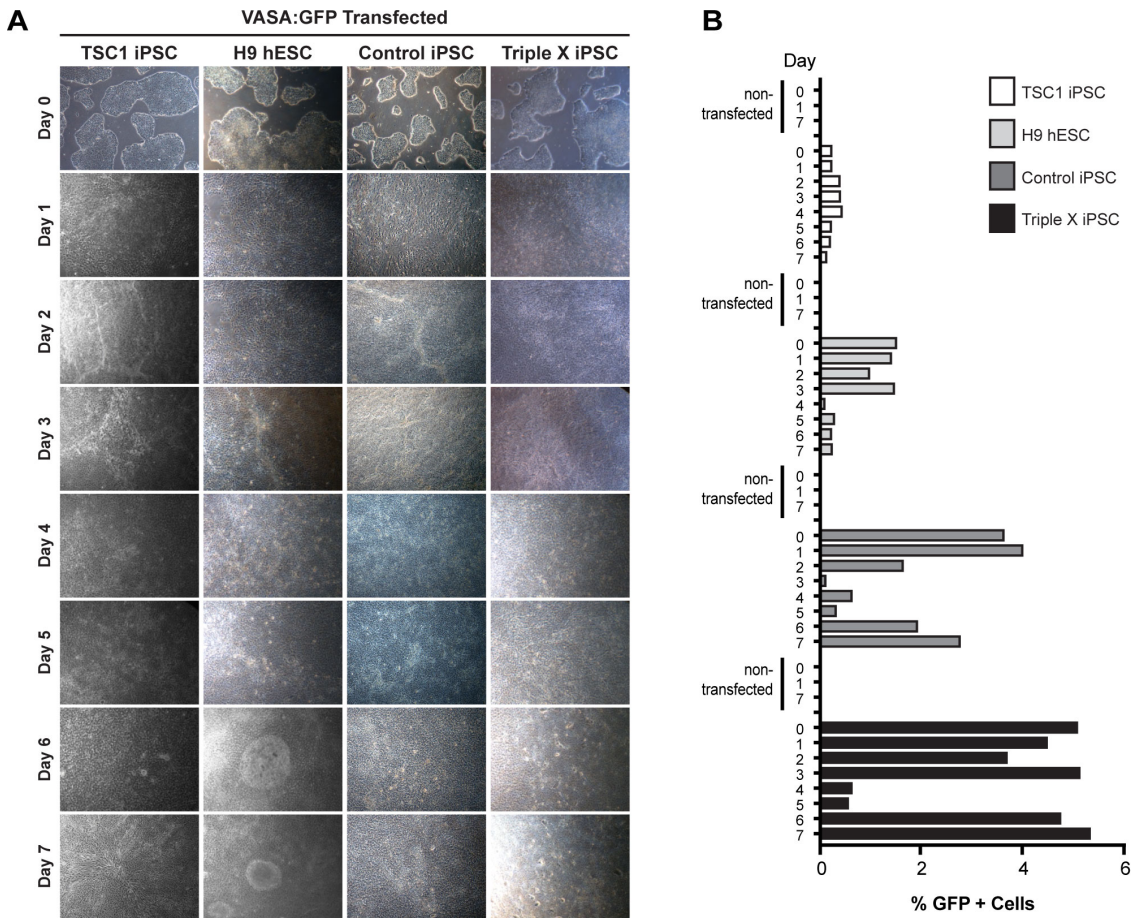

**Supplementary Figure 4: Single cell sorting of VASA:GFP positive pluripotent cells differentiated with BMP4/8 and RA.**

(A) Phase contrast image of VASA:GFP transfected TSC1 iPSC, H9 hESC, Control iPSC and Triple X iPSCs differentiated for seven days by addition of BMP4/8 and RA. (B) Graph indicating the percentage of GFP+ cells for non-transfected and VASA:GFP transfected TSC1 iPSC, H9 hESC, Control iPSC and Triple X iPSCs throughout the seven day directed differentiation.

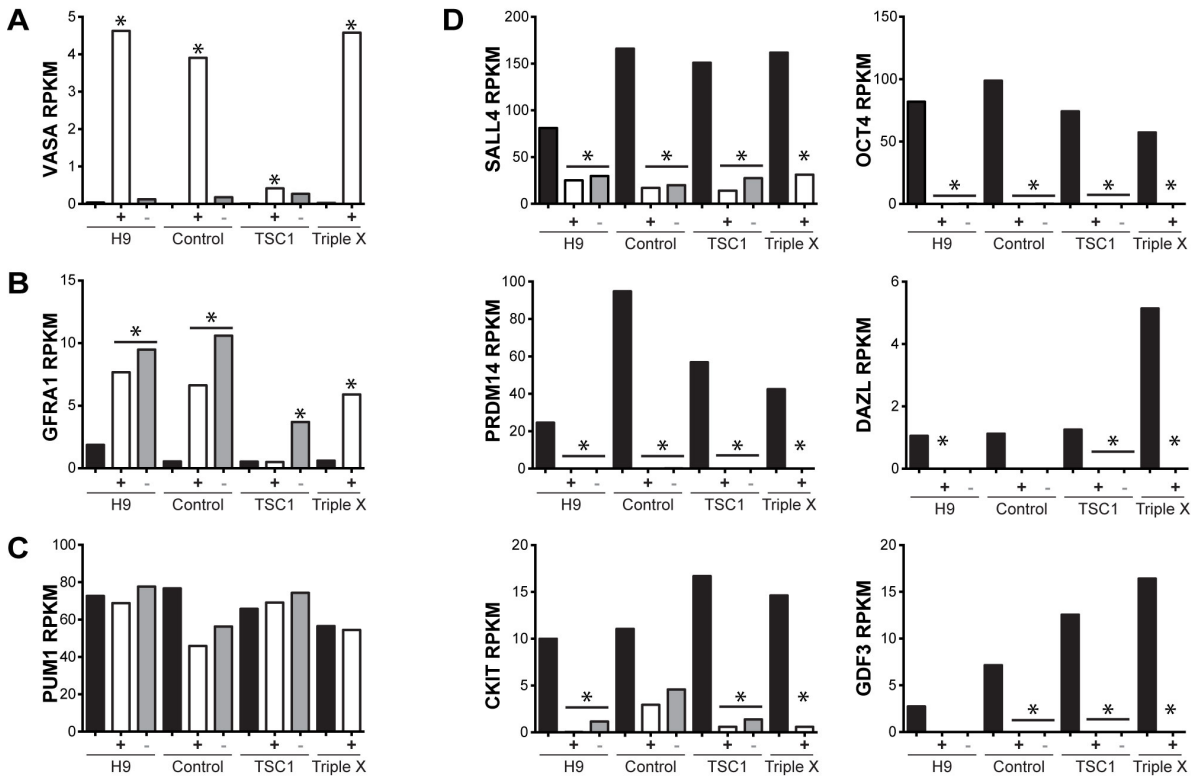

**Supplementary Figure 5: RNA-Seq analysis of germ cell-associated genes in pluripotent cells and sorted GFP+ and GFP- populations after directed differentiation.**

(A-D) Expression of germ cell associated genes (A) *VASA*, (B) *GFRA1*, (C) *PUM1* and (D) *SALL4*, *OCT4*, *PRDM14*, *DAZL*, *CKIT*, and *GDF3*, in pluripotent cells (H9 hESC, Control c8 iPSC, TSC1 c2 iPSC and Triple X iPSC; black bar), day 7 GFP+ population (white bar) and day 7 GFP- population (grey bar) were calculated into RPKM (reads per kilobase per million). Asterisks indicate differentiated samples that have more than two-fold difference in gene expression level compared to the pluripotent cell lines it was derived, using GFOLD with significant cutoff for fold change of 0.01<sup>1</sup>.

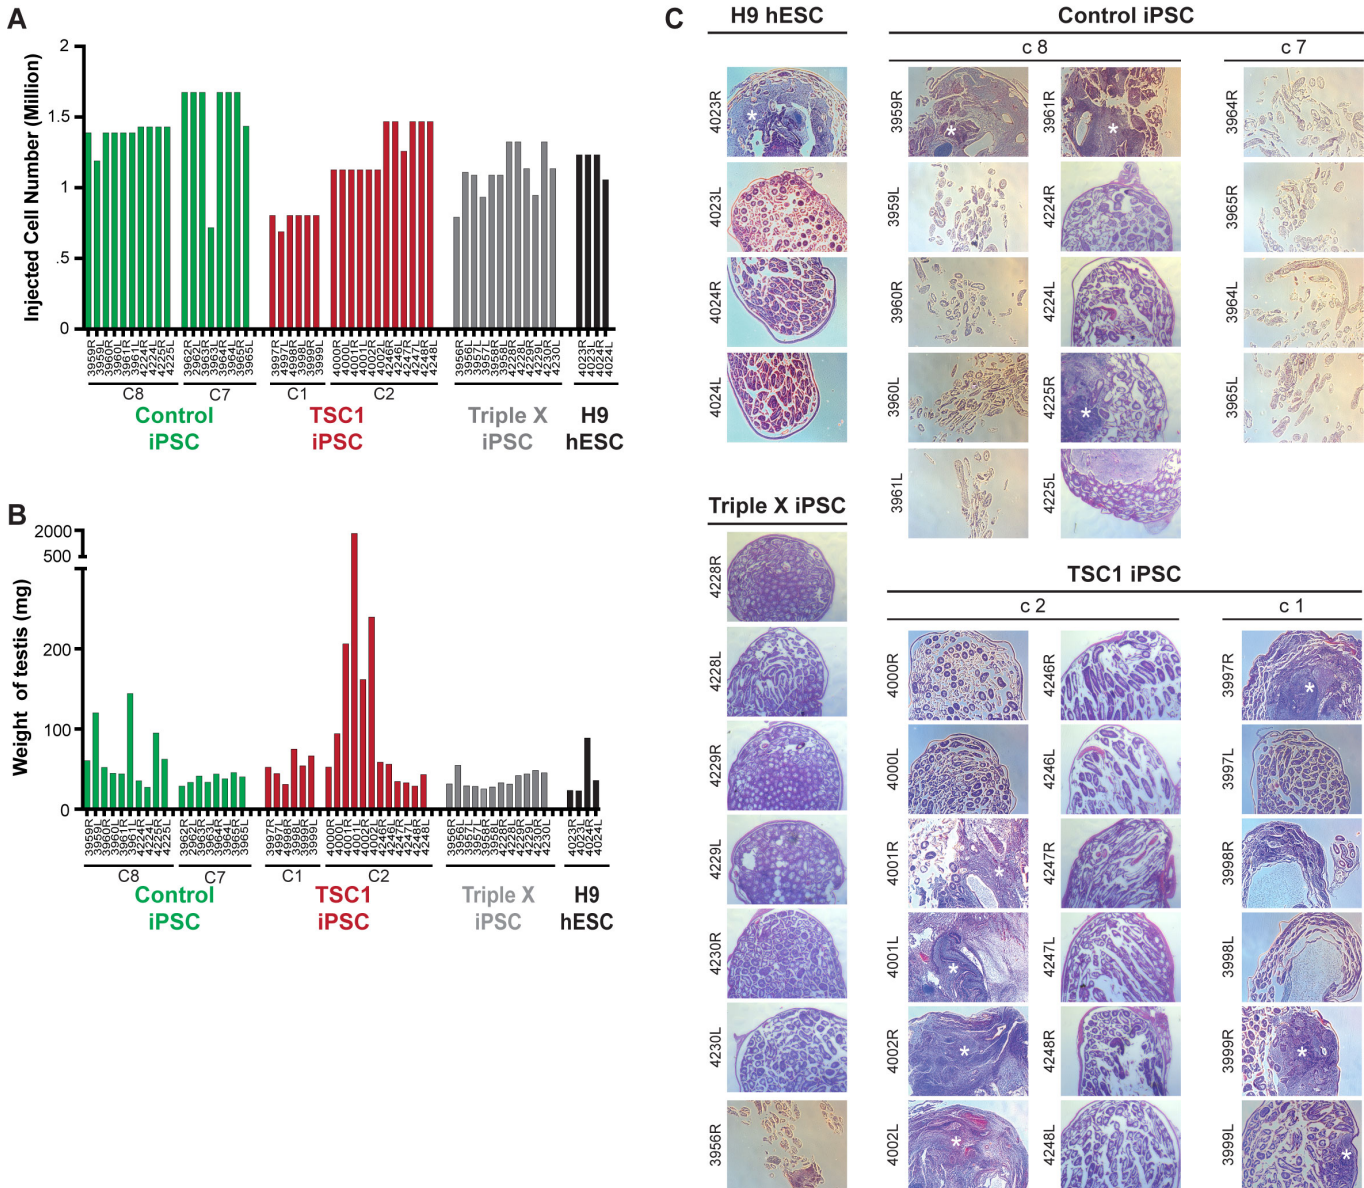

**Supplementary Figure 6: Xenotransplantation of control and X chromosome aneuploid iPSCs into busulfan-treated murine testis.**

(A) Number of injected cells (million) per testis Control (subclone 8 and 7), TSC1 (subclone 2 and 1), Triple X iPSCs and H9 hESCs. (B) Weight (mg) of testis eight weeks post transplantation of Control (subclone 8 and 7), TSC1 (subclone 2 and 1), Triple X iPSCs and H9 hESCs. (C) Histological analysis of H&E stained cross-sections of H9 hESC, Control iPSCs (subclone 8 and 7), Triple X iPSCs and TSC1 (subclones 1 and 2) injected murine testis and seminiferous tubules. Asterisk indicates areas with teratoma-like formations outside the seminiferous tubules.

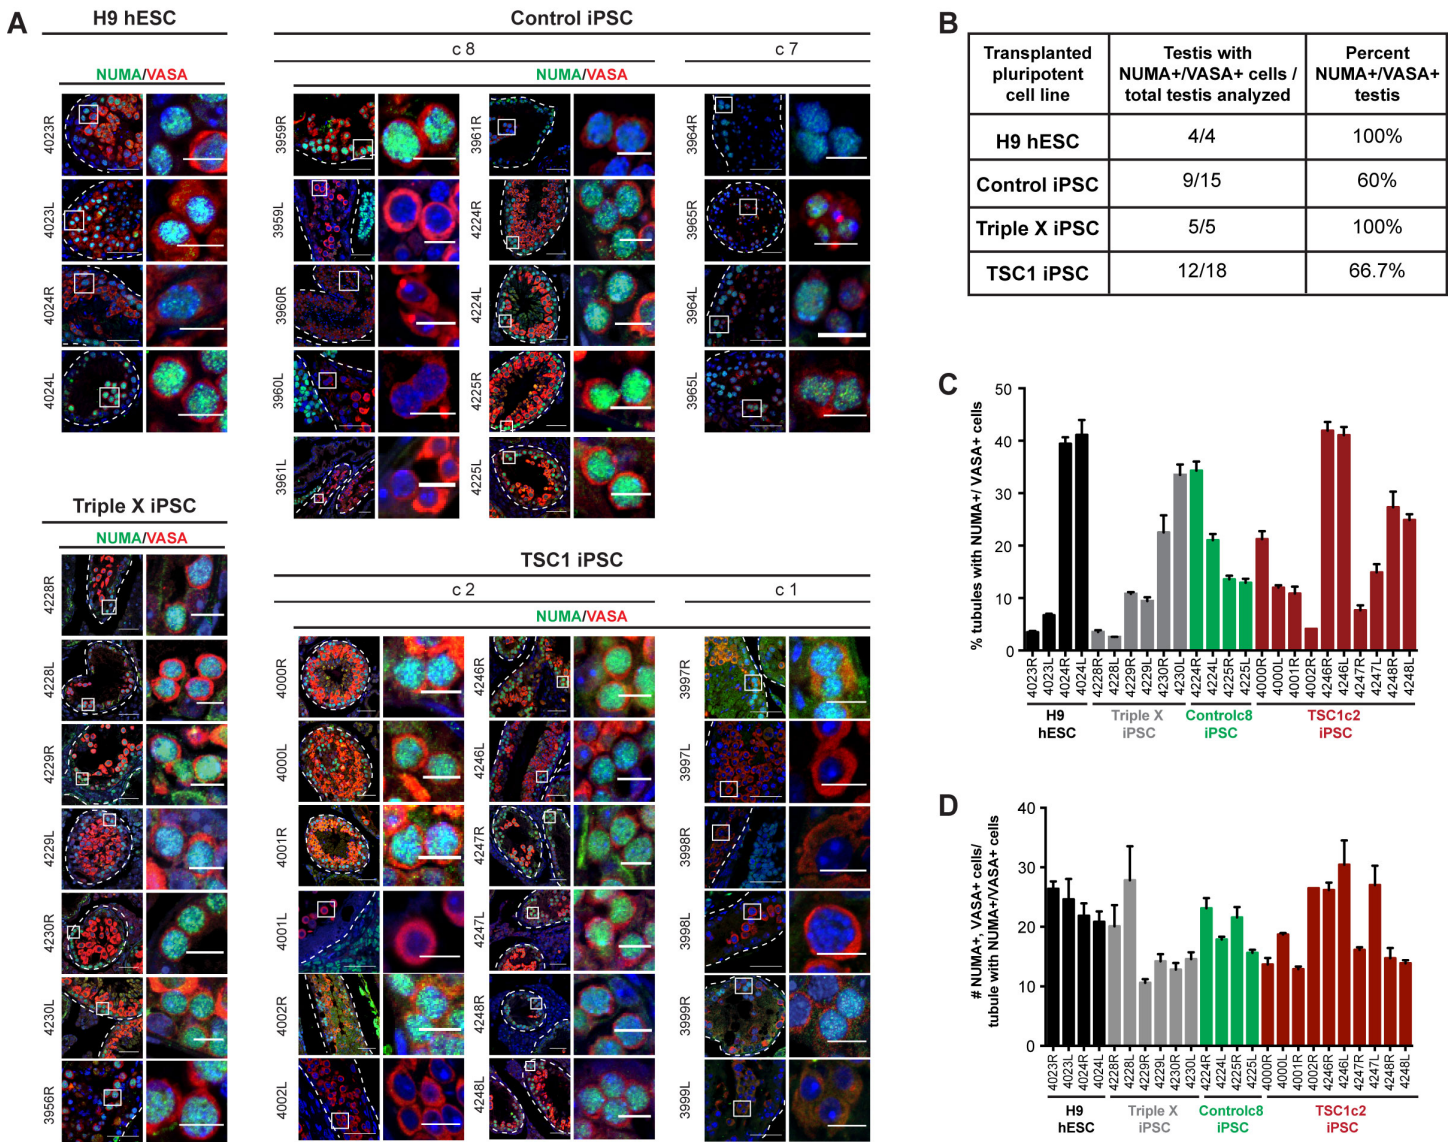

**Supplementary Figure 7: In vivo germ cell formation of control and X chromosome aneuploid pluripotent stem cells within murine seminiferous tubules.**

(A) Histological cross sections from left (L) and right (R) murine testis injected with H9 hESCs, Control iPSCs (subclone 8 and 7), Triple X iPSCs, and TSC1 (subclone 2 and 1). Immunohistochemistry using human specific antibody NUMA (green) and germ cell marker VASA (red) co-stained with nuclear DAPI (blue). White dashed line indicates tubule border. Scale bar, 40µm. White box demonstrates magnified region (Scale bar, 10µm). (B) Table with results of all xenotransplants with number and percentage of testis with NUMA+/VASA+ cells per total testis analyzed. (C & D) Quantification of NUMA/VASA immunohistochemistry results of cross sections from H9 hESC, Triple X iPSC, Control subclone 8 iPSC and TSC1 subclone 2 iPSC injected murine testis. Serial sections were subject to counting (see Materials and Methods). (C) Percentages of tubules with NUMA+/VASA+ cells per total number of tubules within each serial section for each injected murine testis. (D) Number of NUMA+/VASA+ cells per double positive tubule within each serial section for each injected murine testis.

- 1 Feng, J. *et al.* GFOLD: a generalized fold change for ranking differentially expressed genes from RNA-seq data. *Bioinformatics* **28**, 2782-2788, doi:10.1093/bioinformatics/bts515 (2012).

## Supplementary Methods

### Isolation and culture of primary human skin fibroblast and Turner syndrome cell lines

Control and POF female primary fibroblasts were isolated and cultured as previously described<sup>52</sup>. Briefly, fibroblasts were derived from a 4 mm skin punch biopsy obtained by the Stanford University Dermatology clinic after adult donor consent. The biopsy was washed in PBS (Life Technologies), minced and plated onto gelatin-coated plates, and expanded in MEF media containing DMEM (Life technologies), 10% FBS (Life Technologies) and 10 IU/ml pen/strep (Life technologies) and cultured at 37°C. Turner syndrome (TS) fibroblast lines consisted of TS child 1 (TSC1; Detroit 525, ATCC), TS child 2 (TSC2; Coriell GM01176), TS Fetal (TSF; Coriell, GM10179), TS Neonate (TSN; Coriell, GM00857). Gm01166, GM00857 and GM10179, Coriell).

### Spectral Karyotyping

Karyotyping was performed as described in<sup>38</sup>. Briefly, all cell lines were grown to approximately 90% confluence, KaryoMAX Colcemid (Life technologies) was added for approximately 18 hours at 10 µl/ml. The cells were detached using 0.05% Trypsin (Life technologies), washed and incubated in hypotonic solution containing equal volumes of 0.4% Potassium Chloride (Sigma-Aldrich) and 0.4% Sodium Citrate (Sigma-Aldrich) at 37°C for seven minutes. The cells were then fixed with a methanol: glacial acetic acid solution (Fisher Scientific), 3:1 for five consecutive five-minute incubations at room temperature. The cells were then dropped onto a glass slide for metaphase spreads. Spectral Karyotyping was then carried out as indicated by the human specific SKY Paint DNA kit (Applied Spectral Imaging). Twenty spreads per line were analyzed using SKY view spectral imaging system.

### Immunocytochemistry

Cells were fixed in 4% paraformaldehyde (PFA)/PBS (Sigma-Aldrich and Invitrogen) for 20 min., and washed with PBS + 1% Tween (PBST; Sigma-Aldrich) and blocked with 4% normal goat or donkey serum (Jackson ImmunoResearch) in PBS for 30 min. For nuclear staining, cells were permeabilized prior to blocking with 1% Triton-X 100/PBS (Sigma-Aldrich). Primary antibodies were added overnight at 4°C at the following dilutions: SSEA4 (1:200, Millipore), Tra-1-60 (1:200, Millipore), Tra-1-81 (1:200 Millipore), OCT4 (1:100, Santa Cruz),  $\alpha$  feto protein (1:150, R&D), smooth muscle actin (1:200, Abcam) and  $\beta$  III Tubulin (1:150, Covance). The cell were then washed with PBST and secondary antibodies were added for one hour at room temperature, all at a 1:500 dilution, Alexa 488-conjugated goat anti-mouse IgG (Invitrogen), Alexa 488-conjugated goat anti-Rat IgM (Invitrogen), Alexa 488-conjugated goat anti mouse IgM (Invitrogen), Alexa 488-conjugated goat anti rabbit IgG (Invitrogen). Lastly, the cells were washed with PBST and DAPI was used to label cell nuclei.

### In vitro spontaneous differentiation

Embryoid body (EB) differentiation was conducted by transferring iPSCs to an ultra low attachment plate containing DMEM (Life Technologies) + 20% FBS (Life Technologies). After eight days in suspension, EBs were transferred to a gelatin-coated dish and cultured in the same differentiation media until beating cardiomyocytes were observed. The differentiated cells were then passaged to a 24-well plate for immunocytochemistry for  $\alpha$  feto protein, smooth muscle and  $\beta$  III Tubulin.

### Fluorescent associated cell sorting (FACS) for SSEA4 and TRA-1-60

One confluent well of a six-well plate was sorted for each iPSC and fibroblast line. Cells were dissociated to single cells by treatment with Accutase (Life technologies) for 3 – 5 min. Cells were then centrifuged for five min. at 1000 rpm and resuspended in FACS buffer (1X PBS, 0.5% BSA, 2mM EDTA) to a concentration of  $1 \times 10^6$

cells/100 ul. For single staining, 10 ul of cell suspension was used and for double staining 100 ul of cell suspension was used. Cells were blocked with 0.8% mouse IgG (Invitrogen) for ten min. on ice. The cells were then incubated with TRA-1-60 (BD Pharmigen) and SSEA4 (BD Pharmigen) antibodies for 30 min. on ice and protected from light. The cells were subsequently washed with FACS buffer and resuspended in 200 ul FACS buffer with DAPI. Flow-cytometry analysis was performed on a BD FACSAriaII cell sorter. Compensation beads (BDBiosciences), which went through the same staining protocol, were used to ensure proper staining patterns during data acquisition. PE-TRA-1-60 versus FITC-SSEA4 was then used to identify a double positive population, which was then purity sorted before cells were single cell sorted into individual wells of 12-8 strips with 5ul of CellsDirect 2X reaction mix solution (Invitrogen) with 0.05 units of SUPERNase Inhibitor (Ambion).
